# Supplementary material for: Exercise‐linked improvement in age‐associated loss of balance is associated with increased vestibular input to motor neurons
Source: PubMed Central journal article supplement (PMC7744958; doi:10.1111/acel.13274), 2020-11-11
Supplement: ACEL-19-e13274-s001.pdf [file ACEL-19-e13274-s001.pdf]

## **Supplemental data**

### **Content:**

Supplemental Figures S1-S6

Supplemental Table S1

Supplemental Movies S1 (Catwalk gait analysis) and S2 (Balance beam analysis)

# Supplemental Figures

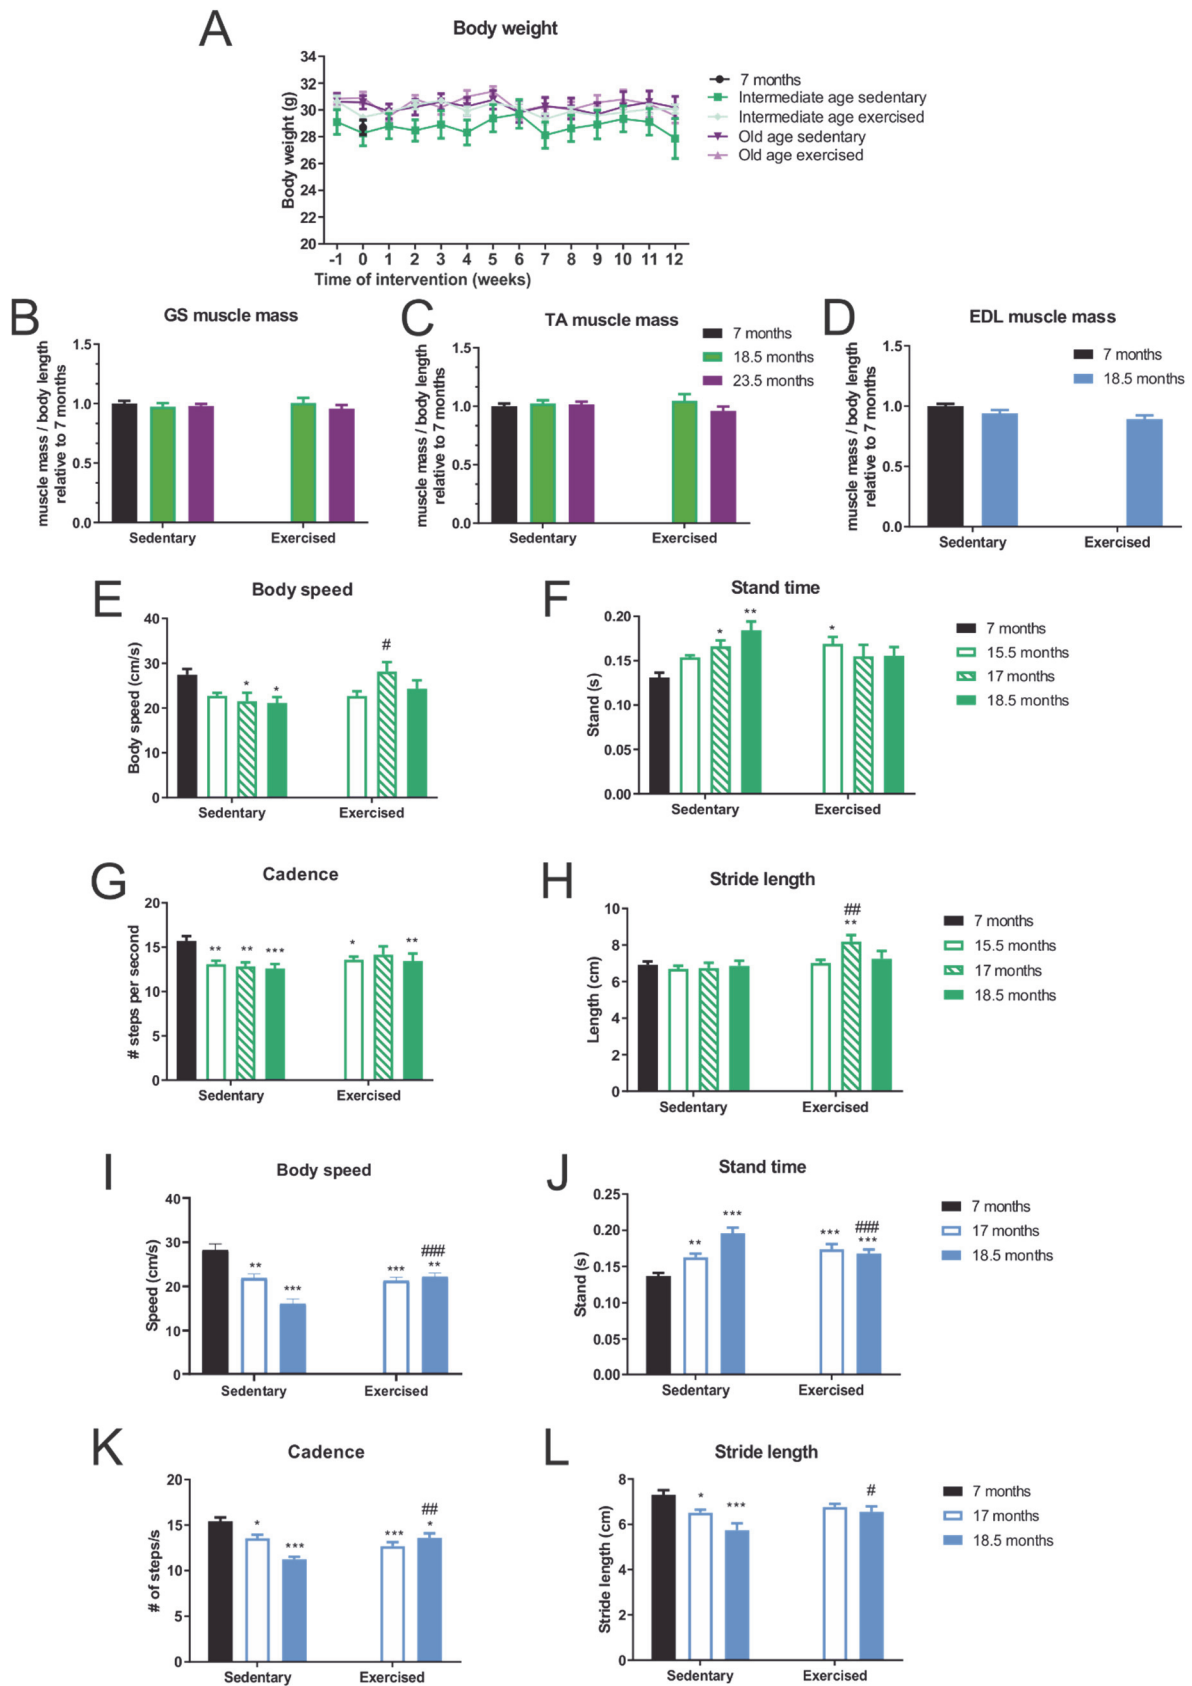

**Suppl. Fig. S1. Age and exercise effects on gait. A,** Body mass of 7 months control, intermediate and old age intervention groups. **B-D,** Mass of GS (B), TA (C) and EDL

(D) muscles of 7 months controls and aged sedentary and exercised mice normalized to body length. E-L, Catwalk gait analysis. Mice voluntarily walked across a glass platform where paw prints were recorded and gait was assessed: body speed (cm/s) (E, I), stand time (s) (F, J), cadence (steps/s) (G, K), and stride length (cm) (H, L). Data are displayed as mean with  $\pm$  SEM. n= 6 to 9 animals per group. In two-way ANOVA; \*p < 0.05; \*\*p < 0.01; \*\*\*p < 0.001 indicate statistically significant differences between 7 months controls and aged groups (age effect) while #p < 0.05; ##p < 0.01; ###p < 0.001 indicate statistically significant differences between sedentary and exercised animals of the same age group (exercise effect).

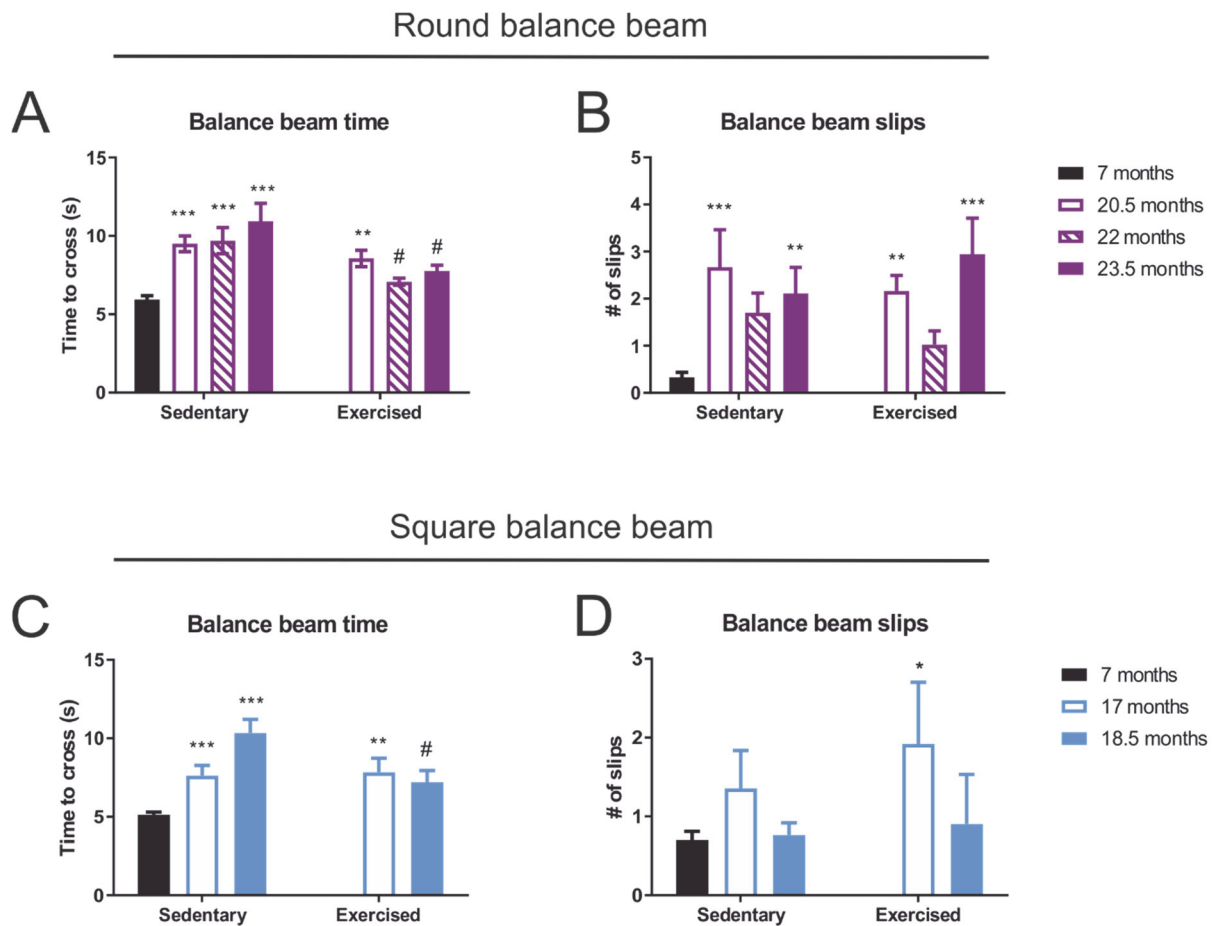

**Suppl. Fig. S2. Exercise improves balance in old mice.** Balance of aged exercised and sedentary mice was assessed using a balance beam test with two different beams. **A**, Time to cross the length of a round balance beam. **B**, Number of slips while traversing a round balance beam in old age animals. **C**, Time to cross the length of a square balance beam. **D**, Number of slips while traversing a square balance beam. Data are displayed as mean with  $\pm$  SEM.  $n=6$  to  $9$  animals per group. In two-way ANOVA,  $*p < 0.05$ ;  $**p < 0.01$ ;  $***p < 0.001$  indicate statistically significant differences between 7 months controls and aged groups (age effect) while  $\#p < 0.05$  indicates statistically significant differences between sedentary and exercised animals of the same age group (exercise effect).

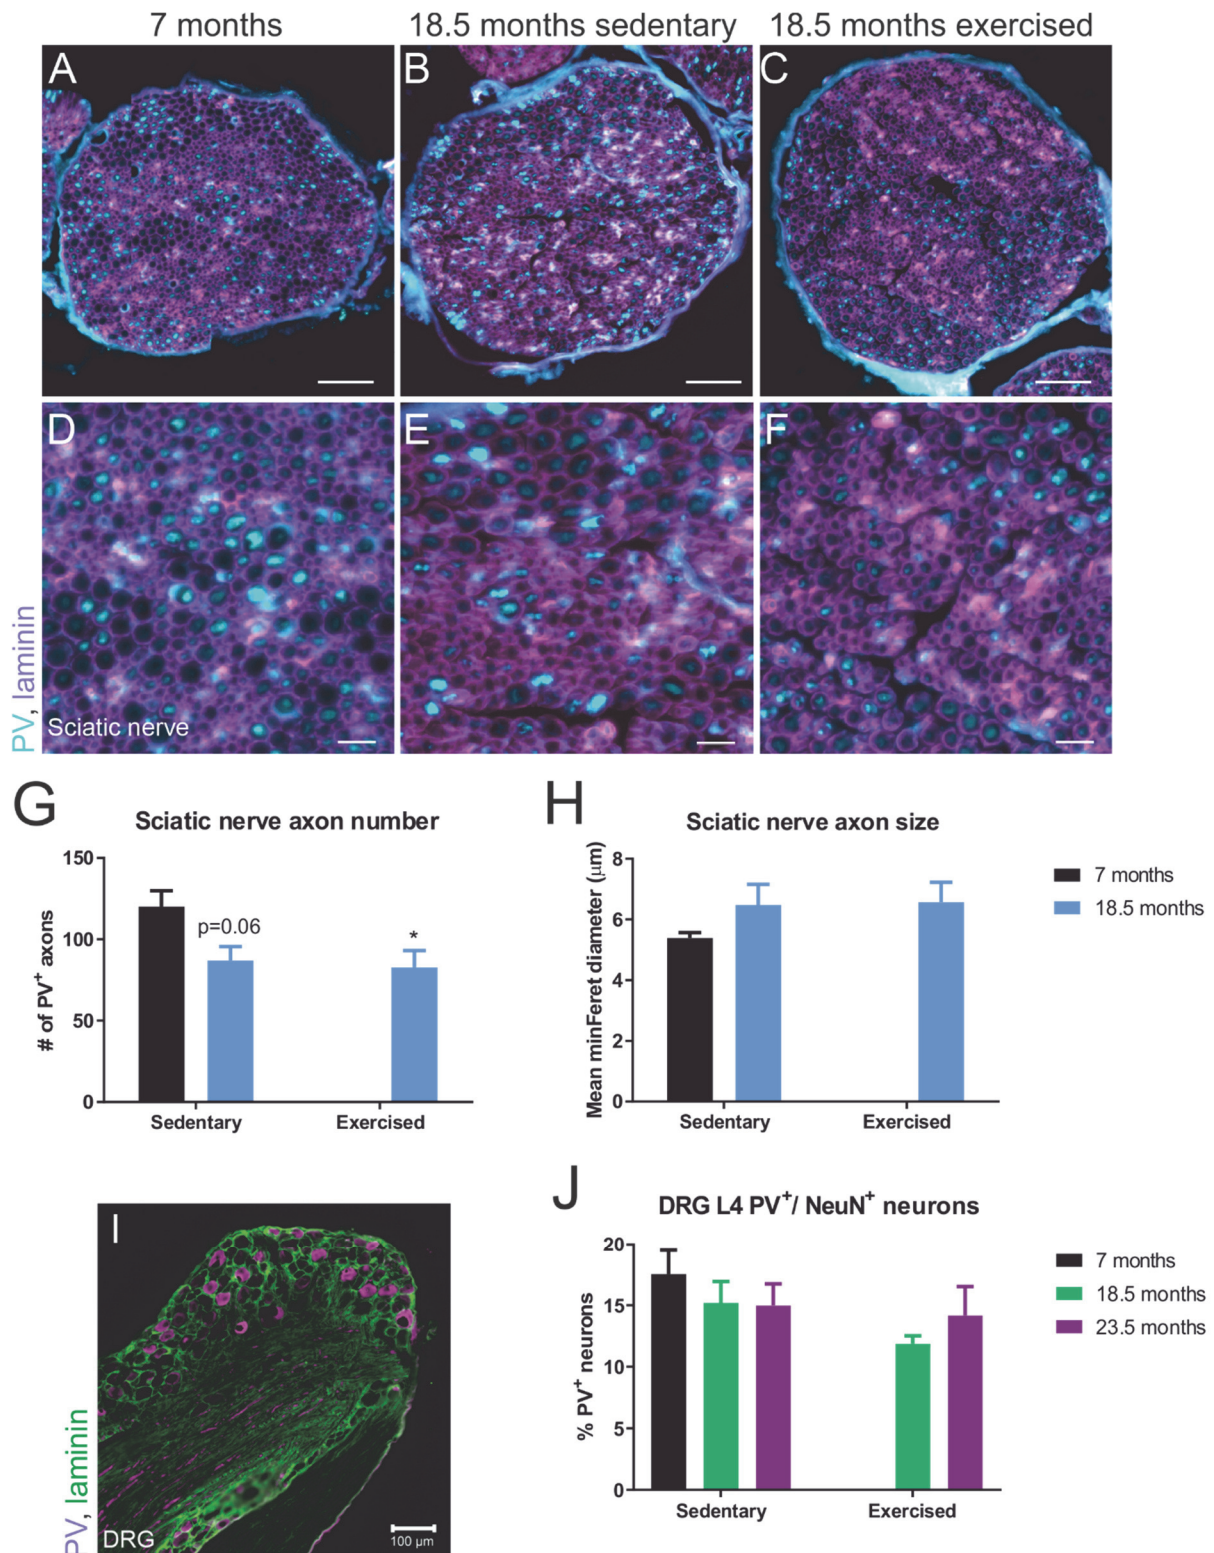

**Suppl. Fig. S3. Proprioceptive sensory neuron number is unaffected by age or exercise.** **A-F**, Representative images of sciatic nerve cross-sections labelled for PV in cyan and laminin in purple. **G**, Number of PV<sup>+</sup> nerve fibres. **H**, Minimal Feret diameter of PV<sup>+</sup> fibers. **I**, Representative image of a section from L4 DRGs. **J**, PV<sup>+</sup>/NeuN<sup>+</sup> proprioceptive sensory neurons were counted and the ratio relative to the

total number of sensory NeuN<sup>+</sup> neurons was calculated. Scale bar = 50  $\mu$ m unless indicated. Data show mean  $\pm$  SEM. \* $p < 0.05$  indicates statistically significant differences between 7 months old controls and aged groups (unpaired, two-tailed Student's T-test). Trends are indicated by stating the P-values relative to 7 months old controls.

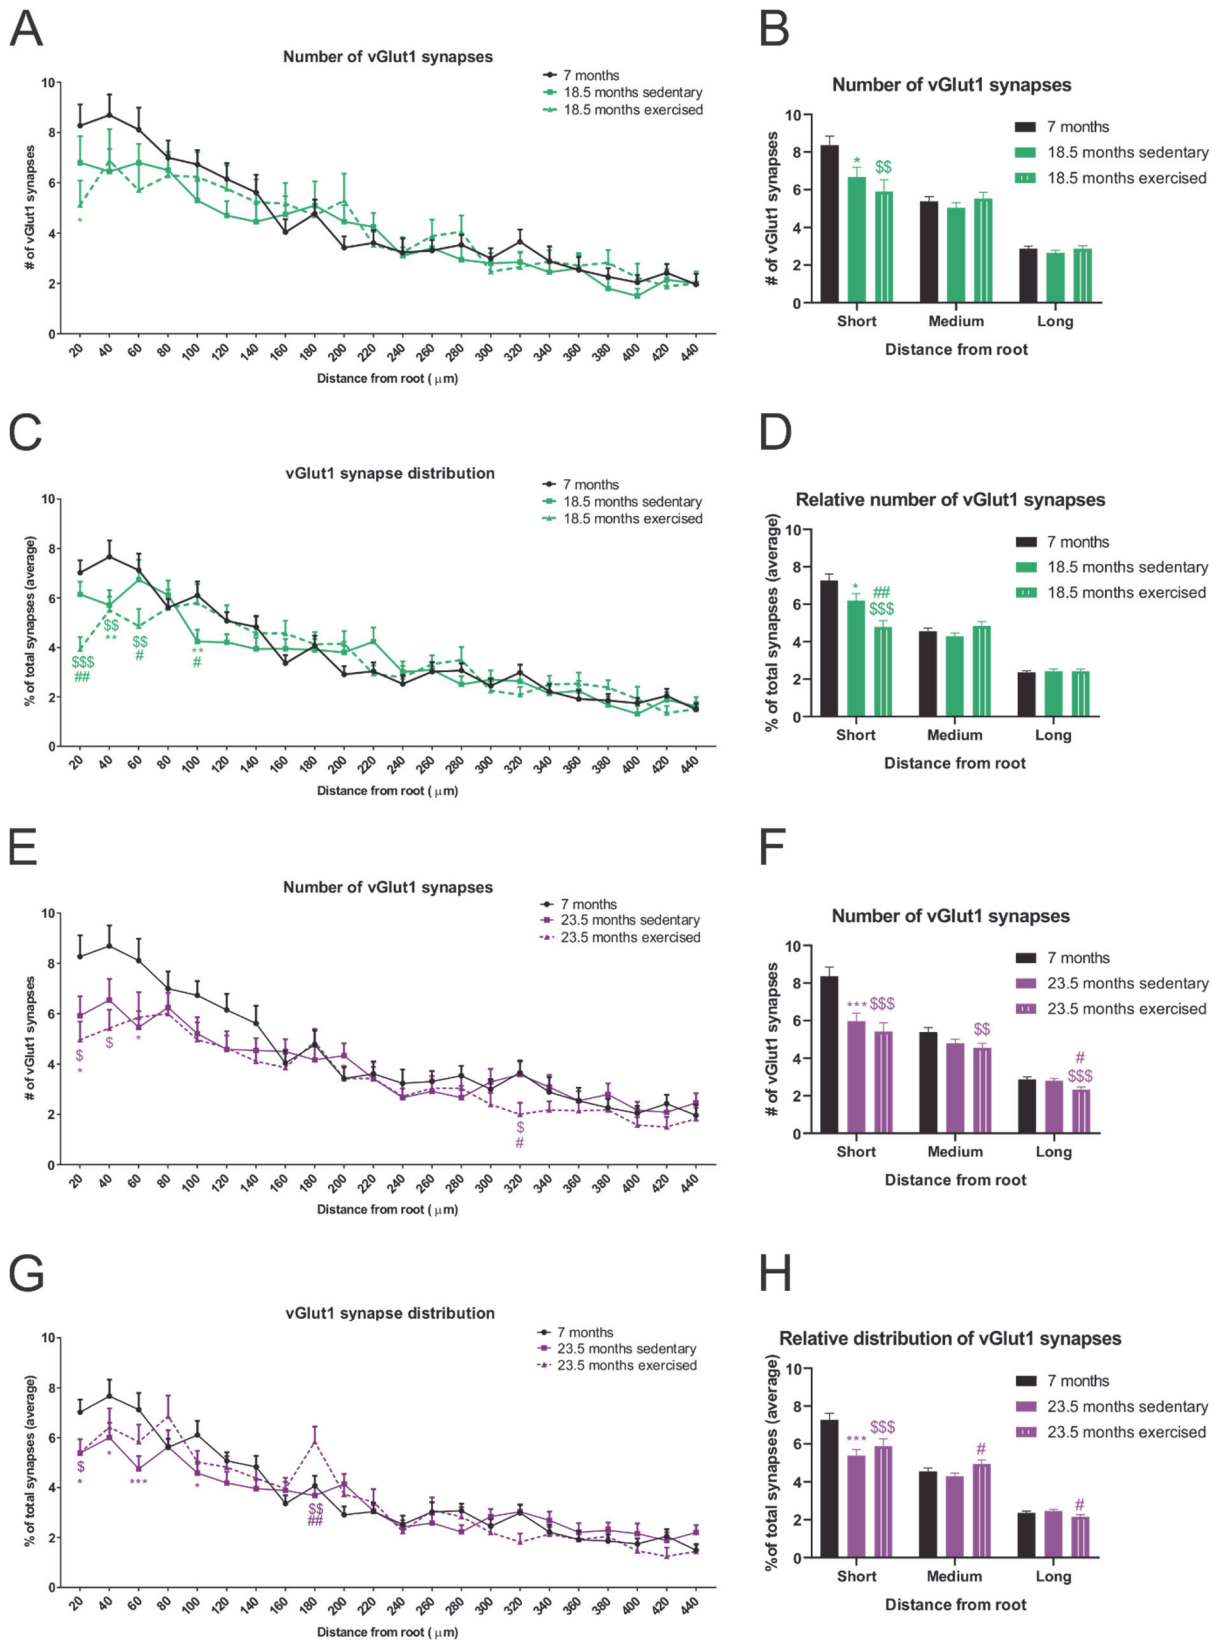

**Suppl. Fig. S4. Loss of vGlut1 synapses is primarily proximal.** Motor neurons from GS muscle were retrogradely traced using G-protein deleted rabies viral vectors. **A-H**, vGlut1<sup>+</sup> synaptic distribution along motor neuronal dendrite branches measured in distance from root in absolute numbers (**A**, **E**) and relative to total vGlut1 synapse

count (**C**, **G**). Number of vestibular synapses on the motor neuron cell soma within short (20-60  $\mu\text{m}$ ), medium (80-200  $\mu\text{m}$ ) and long (220-440  $\mu\text{m}$ ) distance from the root in absolute numbers (**B**, **F**), and relative to total vGlut1 synapse count (**D**, **H**). Data are displayed as mean with  $\pm$  SEM.  $n= 6$  to  $9$  animals per group. \* $p < 0.05$ ; \*\* $p < 0.01$ ; \*\*\* $p < 0.001$  indicate statistically significant differences between 7 months controls and aged sedentary groups. \$ $p < 0.05$ ; \$\$ $p < 0.01$ ; \$\$\$ $p < 0.001$  indicate statistically significant differences between 7 months controls and aged exercised groups. # $p < 0.05$ ; ## $p < 0.01$  indicate statistically significant differences between sedentary and exercised animals of the same age group (unpaired, two-tailed Student's T-test).



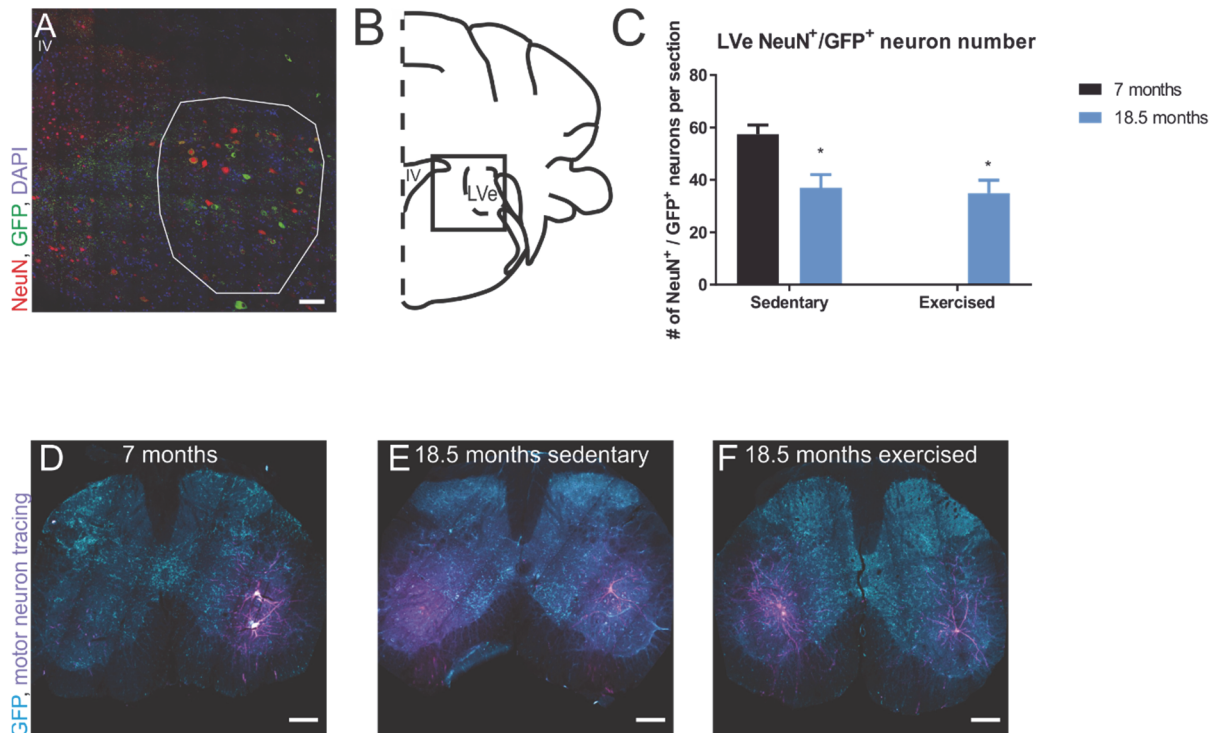

**Suppl. Fig. S5. AAV-mediated tracing of descending LVe vestibular neurons.** An AAV-vector containing a plasmid with a synaptophysin- GFP tag was injected into the LVe. **A**, Representative image of LVe region from coronal brain section labelled for NeuN in red, GFP in green, and DAPI in blue. **B**, Schematic representation of coronal brain section with IV ventricle and the LVe region (dotted line). The square represents the field of view of the images. **C**, Number of infected LVe neurons per section. A minimum of three brain sections per animal were analysed and the mean calculated.  $n = 5$  to  $7$  animals. **D-F**, Distribution of vestibular synapses and motor neurons in representative spinal cord sections. In A scale bar =  $100\ \mu\text{m}$  and in D to F scale bar =  $200\ \mu\text{m}$ . Data show mean  $\pm$  SEM. \* $p < 0.05$  indicates statistically significant differences between 7 months controls and aged groups (unpaired, two-tailed Student's T-test).

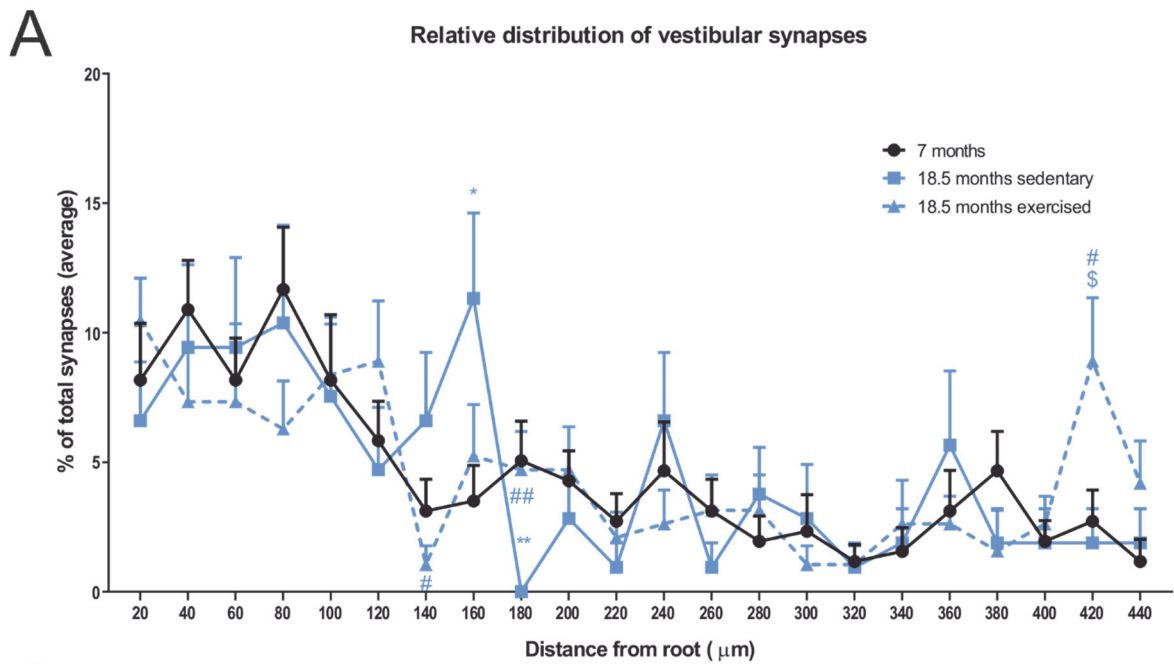

**B**

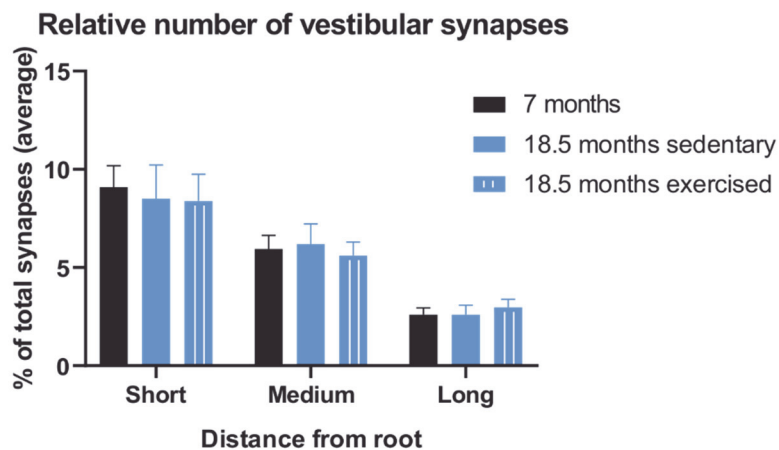

**Suppl. Fig. S6. The relative distribution of vestibular synapses is largely unchanged.** Vestibular synapses were traced by injecting an AAV containing a plasmid with a synaptophysin-GFP tag into the LVe. Motor neurons from soleus muscle were retrogradely traced using G-protein-deleted rabies viral vectors encoding fluorescent proteins ( $\Delta\text{G-prot. rabies FP}$ ). **A**, Relative number of vestibular synapses on the motor neuron cell soma. **B**, Number of vestibular synapses on the motor neuron cell soma within short (20-60  $\mu\text{m}$ ), medium (80-200  $\mu\text{m}$ ) and long (220-440  $\mu\text{m}$ ) distance from the root. A minimum of 41 motor neurons from a minimum of five different animals per group were analyzed. \* $p < 0.05$ ; \*\* $p < 0.01$  indicate statistically significant differences between 7 months control and aged sedentary groups. \$ $p < 0.05$  indicates

statistically significant differences between 7 months control and aged exercise groups. #p<0.05; ##p < 0.01 indicate statistically significant differences between sedentary and exercised animals of the same age group (unpaired, two-tailed Student's T-test).

**Suppl. Table S1: List of all antibodies used for immunohistochemistry.**

| Target                  | Dilution | Reference       | Company                                 |
|-------------------------|----------|-----------------|-----------------------------------------|
| Anti-Laminin<br>alpha 2 | 1:500    | ab11576         | abcam                                   |
| Anti-S46                | 1:50     |                 | Developmental Studies Hybridoma<br>Bank |
| Anti-NFH                | 1:200    | AB1991          | Chemicon                                |
| Anti-Parvalbumin        | 1:500    | PV27            | Swant                                   |
| Anti-NeuN               | 1:500    | ab134014        | abcam                                   |
| Anti-NeuN               | 1:100    | MAB377          | Millipore                               |
| Anti-vGlut1             | 1:20'000 | AB5905          | Chemicon                                |
| Anti-RFP                | 1:5'000  | 600-401-<br>379 | Rockland                                |
| Anti-GFP                | 1:1'000  | A10262          | Invitrogen                              |
| A488 anti-rat           | 1:100    | A11006          | Invitrogen                              |
| A568 anti-mouse         | 1:100    | A21124          | Invitrogen                              |
| A647 anti-rabbit        | 1:100    | 711-605-<br>152 | Jackson Immuno Research                 |
| A568 anti-rabbit        | 1:100    | A10042          | Invitrogen                              |
| A647 anti-guinea<br>pig | 1:100    | AP193SA6        | Chemicon                                |
| A488 anti-chicken       | 1:100    | A11039          | Invitrogen                              |
